# Supplementary material
Source: PubMed Central journal article supplement (PMC2932872)
Supplement: NIHMS218740-supplement-1_si_001.pdf [file NIHMS218740-supplement-1_si_001.pdf]

**Supplementary material for:**

Thionate versus Oxon: A Comparison of Stability, Uptake, and Cell Toxicity of ( $^{14}\text{C}_3\text{O}$ )<sub>2</sub>-Labeled Methyl Parathion and Methyl Paraoxon with SH-SY5Y Cells.

*Sandip B. Bharate, John M. Prins, Kathleen M. George and Charles M. Thompson\**

**Table A. Total radioactivity counts inside cells after OP exposure (Preliminary uptake experiment)\***

| OP exposure time (h) | CPM [Mean $\pm$ SEM] |                      |
|----------------------|----------------------|----------------------|
|                      | $^{14}\text{C}$ -MPS | $^{14}\text{C}$ -MPO |
| 0                    | 1046 $\pm$ 20        | 714 $\pm$ 22         |
| 12                   | 1743 $\pm$ 19        | 3538 $\pm$ 599       |
| 24                   | 2104 $\pm$ 66        | 7180 $\pm$ 197       |
| 48                   | 1944 $\pm$ 108       | 7936 $\pm$ 413       |
| 72                   | 2031 $\pm$ 148       | 5831 $\pm$ 371       |
| 96                   | 2314 $\pm$ 132       | 4559 $\pm$ 163       |

\*Total counts (media + cells) for  $^{14}\text{C}$ -MPS = 140,000 to 153,000 and for  $^{14}\text{C}$ -MPO = 161,000 to 173,000 [2 ml of media containing 1  $\mu\text{M}$  OP used for each well treatment].

**Table B. Radioactivity counts for OP and their degradation products in cell cytosolic fractions\***

| Cells exposed to OP  | OP or its degradation product in cytosol | CPM [Mean $\pm$ SEM] / $10^6$ cells <sup>#</sup> |                |                |
|----------------------|------------------------------------------|--------------------------------------------------|----------------|----------------|
|                      |                                          | 24 h                                             | 48 h           | 72 h           |
| $^{14}\text{C}$ -MPS | $^{14}\text{C}$ -MPS                     | 478 $\pm$ 13                                     | 690 $\pm$ 73   | 545 $\pm$ 61   |
|                      | $^{14}\text{C}$ -MPO                     | 350 $\pm$ 19                                     | 574 $\pm$ 72   | 472 $\pm$ 42   |
|                      | $^{14}\text{C}$ -DMTP                    | 230 $\pm$ 11                                     | 251 $\pm$ 48   | 233 $\pm$ 22   |
|                      | Total counts in cytosol                  | 1058 $\pm$ 32                                    | 1516 $\pm$ 187 | 1251 $\pm$ 112 |
| $^{14}\text{C}$ -MPO | $^{14}\text{C}$ -MPO                     | 196 $\pm$ 95                                     | 554 $\pm$ 78   | 358 $\pm$ 18   |
|                      | $^{14}\text{C}$ -DMP                     | 1481 $\pm$ 215                                   | 2052 $\pm$ 119 | 1232 $\pm$ 27  |
|                      | Total counts in cytosol                  | 1677 $\pm$ 272                                   | 2606 $\pm$ 150 | 1590 $\pm$ 42  |

<sup>#</sup>Counts were normalized for  $10^6$  cells; \*Total counts (media + cells) for  $^{14}\text{C}$ -MPS = 1266600 to 1334400 and for  $^{14}\text{C}$ -MPO = 1397300 to 1481700 [20 ml of media containing 1  $\mu\text{M}$  OP used for each Petri-dish plate treatment].
